# Supplementary material
Source: PubMed Central journal article supplement (PMC2861917)
Supplement: NIHMS196766-supplement-Supp_Materials.pdf [file NIHMS196766-supplement-Supp_Materials.pdf]

## Supplementary files

## Supplementary table 1. Study design

| Population      | GWAS genotyping platform                                                                                                   | N Case/Controls<br>After genotyping<br>quality controls | Genotyped<br>SNPs | Analyzed<br>SNPs<br>(overlapping<br>between<br>populations) | Statistical<br>Power* |
|-----------------|----------------------------------------------------------------------------------------------------------------------------|---------------------------------------------------------|-------------------|-------------------------------------------------------------|-----------------------|
| USA             | Illumina Human 550K /(1) breast cancer controls CGEMS, (2) prostate cancer controls CGEMS; and (3) Illumina controls (ref) | 1486/3477                                               | 488.793           | 279.621                                                     | 0.99                  |
| Spain           | Illumina Human CNV370K BeadChip/ Illumina Human CNV370K BeadChip                                                           | 364/384                                                 | 322.967           | 279.621                                                     | 0.90                  |
| Germany         | Illumina Human CNV370K BeadChip/ Illumina Human550K (ref)                                                                  | 270/671                                                 | 308.299           | 279.621                                                     | 0.92                  |
| The Netherlands | Illumina Human CNV370K BeadChip/ Illumina Human550K (ref)                                                                  | 176/639                                                 | 308.349           | 279.621                                                     | 0.81                  |
| Total           | -                                                                                                                          | 2296/5171                                               | -                 |                                                             | 0.99                  |

\*for detecting and OR of 1.5 with a MAF of 0.20

**Supplementary table 2. SNPs associated with SSc at genome-wide significance within the MHC region.**

| CHR | SNP        | Closest Gene | BP         | Minor Allele | MAF   | GC                | PC                | OR    | CI 95%    |
|-----|------------|--------------|------------|--------------|-------|-------------------|-------------------|-------|-----------|
|     |            |              |            |              |       | Corrected P Value | Corrected P value |       |           |
| 6   | rs6457617  | HLA-DQB1     | 32,771,829 | C            | 0.466 | 3.98E-17          | 3.85E-19          | 0.729 | 0.68-0.78 |
| 6   | rs2856705  | HLA-DQB1     | 32,778,934 | A            | 0.096 | 2.19E-14          | 3.71E-14          | 0.591 | 0.52-0.67 |
| 6   | rs9275390  | HLA-DQB1     | 32,777,134 | C            | 0.271 | 2.17E-11          | 1.87E-10          | 1.314 | 1.22-1.42 |
| 6   | rs5000634  | HLA-DQB1     | 32,771,542 | C            | 0.403 | 3.88E-11          | 9.13E-13          | 1.283 | 1.20-1.38 |
| 6   | rs443198   | NOTCH4       | 32,298,384 | C            | 0.355 | 5.98E-10          | 6.82E-12          | 0.784 | 0.73-0.84 |
| 6   | rs2071286  | NOTCH4       | 32,287,874 | A            | 0.25  | 2.68E-09          | 1.67E-10          | 1.284 | 1.19-1.39 |
| 6   | rs2516399  | MICB         | 31,589,278 | C            | 0.105 | 5.68E-09          | 6.27E-09          | 0.688 | 0.61-0.78 |
| 6   | rs1521     | MICA         | 31,458,683 | C            | 0.235 | 7.18E-09          | 8.96E-09          | 0.769 | 0.71-0.84 |
| 6   | rs9275312  | HLA-DQB1     | 32,773,706 | G            | 0.141 | 8.04E-09          | 3.70E-08          | 1.345 | 1.22-1.48 |
| 6   | rs479536   | NOTCH4       | 32,301,656 | T            | 0.058 | 1.59E-08          | 1.50E-08          | 0.615 | 0.52-0.72 |
| 6   | rs2071295  | TNXB         | 32,146,678 | A            | 0.34  | 2.22E-08          | 2.71E-09          | 1.242 | 1.15-1.34 |
| 6   | rs2523477  | MICA         | 31,468,368 | G            | 0.082 | 2.64E-08          | 1.94E-07          | 0.669 | 0.58-0.77 |
| 6   | rs12153855 | TNXB         | 32,182,782 | C            | 0.098 | 2.70E-08          | 5.08E-08          | 0.692 | 0.61-0.78 |
| 6   | rs2844494  | MICB         | 31,591,394 | G            | 0.312 | 2.99E-08          | 3.22E-08          | 0.798 | 0.74-0.86 |
| 6   | rs2239689  | TNXB         | 32,138,262 | T            | 0.342 | 4.01E-08          | 4.64E-09          | 1.237 | 1.15-1.33 |
| 6   | rs3129871  | HLA-DRA      | 32,514,320 | A            | 0.343 | 4.92E-08          | 4.95E-08          | 0.806 | 0.75-0.87 |
| 6   | rs1035798  | AGER         | 32,259,200 | T            | 0.278 | 5.32E-08          | 2.66E-09          | 1.249 | 1.16-1.35 |
| 6   | rs3104398  | HLA-DQA2     | 32,793,663 | A            | 0.11  | 8.16E-08          | 2.81E-07          | 0.718 | 0.64-0.81 |
| 6   | rs2261033  | BAT2         | 31,711,570 | C            | 0.49  | 9.83E-08          | 2.49E-06          | 1.219 | 1.14-1.31 |
| 6   | rs204999   | PRRT1        | 32,217,957 | G            | 0.26  | 1.13E-07          | 2.30E-09          | 0.795 | 0.73-0.86 |
| 6   | rs9277554  | HLA-DPB1     | 33,163,516 | T            | 0.297 | 1.33E-07          | 4.64E-08          | 1.236 | 1.15-1.33 |
| 6   | rs2516398  | MICB         | 31,589,505 | C            | 0.312 | 1.53E-07          | 1.64E-07          | 0.807 | 0.75-0.87 |
| 6   | rs6901221  | HLA-DPB2     | 33,206,254 | C            | 0.166 | 1.91E-07          | 1.19E-07          | 1.29  | 1.18-1.41 |
| 6   | rs7774954  | HLA-DQB2     | 32,832,167 | A            | 0.066 | 2.13E-07          | 3.06E-07          | 0.662 | 0.57-0.77 |
| 6   | rs2248462  | MICB         | 31,554,775 | A            | 0.207 | 2.22E-07          | 3.27E-07          | 0.784 | 0.72-0.86 |
| 6   | rs2596480  | MICA         | 31,533,964 | A            | 0.077 | 2.40E-07          | 6.55E-07          | 0.683 | 0.59-0.79 |
| 6   | rs707939   | MSH5         | 31,834,667 | T            | 0.37  | 2.43E-07          | 6.55E-07          | 1.217 | 1.13-1.31 |
| 6   | rs2516509  | MICB         | 31,557,973 | G            | 0.207 | 3.08E-07          | 4.19E-07          | 0.786 | 0.72-0.86 |
| 6   | rs2075800  | HSPA1L       | 31,885,925 | A            | 0.355 | 3.70E-07          | 1.58E-07          | 1.216 | 1.13-1.31 |
| 6   | rs3095352  | DDR1         | 30,913,900 | G            | 0.424 | 4.19E-07          | 3.12E-06          | 0.826 | 0.77-0.89 |
| 6   | rs12665700 | C6orf205     | 31,104,111 | T            | 0.137 | 8.18E-07          | 7.25E-07          | 1.293 | 1.17-1.43 |
| 6   | rs3129941  | C6orf10      | 32,445,664 | A            | 0.227 | 9.50E-07          | 1.43E-06          | 0.801 | 0.74-0.87 |
| 6   | rs6941112  | STK19        | 32,054,593 | A            | 0.343 | 1.24E-06          | 2.29E-07          | 1.206 | 1.12-1.30 |

**Supplementary Table 3. Association analysis of overall top SNPs on each population separately. Right most column show Breslow-Day P value for the heterogeneity on the odds ratio.**

| CHR     | Gene           | SNP        | Position      | Minor Allele | Population    | MAF (case/control) | P Value* | OR (95 CI)       | Breslow-day P value |
|---------|----------------|------------|---------------|--------------|---------------|--------------------|----------|------------------|---------------------|
| 6p21    | HLA-DQB1       | rs6457617  | 32771829      | C            | United States | 0.403/0.487        | 1.17E-14 | 0.71 (0.65-0.77) | 5.11E-02            |
|         |                |            |               | C            | Spain         | 0.402/0.474        | 5.22E-03 | 0.74 (0.61-0.92) |                     |
|         |                |            |               | C            | Germany       | 0.400/0.504        | 4.67E-05 | 0.66 (0.54-0.80) |                     |
|         |                |            |               | C            | Holland       | 0.491/0.488        | 9.14E-01 | 1.01 (0.80-1.28) |                     |
| 7q32    | TNPO3/<br>IRF5 | rs10488631 | 128381419     | C            | United States | 0.149/0.105        | 5.44E-10 | 1.49 (1.13-1.69) | 4.34E-01            |
|         |                |            |               | C            | Spain         | 0.115/0.090        | 1.03E-01 | 1.32 (0.94-1.85) |                     |
|         |                |            |               | C            | Germany       | 0.170/0.101        | 2.62E-05 | 1.84 (1.38-2.44) |                     |
|         |                |            |               | C            | Holland       | 0.125/0.095        | 9.69E-02 | 1.36 (0.94-1.97) |                     |
|         |                | A          | United States | 0.169/0.132  | 1.27E-06      | 1.34 (1.19-1.51)   | 5.80E-01 |                  |                     |
|         |                | A          | Spain         | 0.143/0.132  | 5.24E-01      | 1.10 (0.82-1.48)   |          |                  |                     |
|         |                | A          | Germany       | 0.161/0.125  | 3.94E-02      | 1.34 (1.01-1.78)   |          |                  |                     |
|         |                | A          | Holland       | 0.145/0.117  | 1.52E-01      | 1.28 (0.91-1.80)   |          |                  |                     |
| 2q32    | STAT4          | rs3821236  | 191611003     | A            | United States | 0.234/0.204        | 7.74E-04 | 1.19 (1.08-1.32) | 3.97E-02            |
|         |                |            |               | A            | Spain         | 0.278/0.189        | 4.88E-05 | 1.65 (1.29-2.10) |                     |
|         |                |            |               | A            | Germany       | 0.257/0.194        | 2.54E-03 | 1.44 (1.13-1.82) |                     |
|         |                |            |               | A            | Holland       | 0.278/0.203        | 2.39E-03 | 1.52 (1.16-1.99) |                     |
| 1q22-23 | CD247          | rs2056626  | 165687049     | G            | United States | 0.379/0.428        | 5.82E-06 | 0.82 (0.75-0.89) | 4.26E-01            |
|         |                |            |               | G            | Spain         | 0.324/0.384        | 1.60E-02 | 0.77 (0.62-0.95) |                     |
|         |                |            |               | G            | Germany       | 0.344/0.402        | 1.95E-02 | 0.78 (0.63-0.96) |                     |
|         |                |            |               | G            | Holland       | 0.420/0.425        | 8.90E-01 | 0.98 (0.77-1.25) |                     |
| 6p25    | EXOC2/<br>IRF4 | rs4959270  | 402748        | A            | United States | 0.466/0.502        | 1.33E-03 | 0.87 (0.80-0.95) | 5.88E-02            |
|         |                |            |               | A            | Spain         | 0.408/0.513        | 4.63E-05 | 0.65 (0.53-0.80) |                     |
|         |                |            |               | A            | Germany       | 0.392/0.466        | 3.54E-03 | 0.74 (0.60-0.91) |                     |
|         |                |            |               | A            | Holland       | 0.426/0.470        | 1.39E-01 | 0.84 (0.66-1.06) |                     |
| 18q22   | CDH7           | rs10515998 | 61521202      | G            | United States | 0.056/0.039        | 1.32E-04 | 1.47 (1.20-1.79) | 5.30E-03            |
|         |                |            |               | G            | Spain         | 0.060/0.059        | 9.65E-01 | 1.01 (0.66-1.55) |                     |
|         |                |            |               | G            | Germany       | 0.093/0.052        | 1.20E-03 | 1.86 (1.27-2.72) |                     |
|         |                |            |               | G            | Holland       | 0.062/0.018        | 1.28E-05 | 3.54 (1.94-6.48) |                     |

\* P values uncorrected for  $\lambda$

**Supplementary table 4. Replication phase study design.**

| <b>Population</b> | <b>N Case/Controls</b> |
|-------------------|------------------------|
| Belgium           | 189/274                |
| Spain             | 455/739                |
| The Netherlands   | 228/279                |
| Germany           | 207/285                |
| Italy             | 348/727                |
| Norway            | 113/283                |
| Sweden            | 279/455                |
| UK                | 500/384                |
| US                | 434/1143               |
| <b>Total</b>      | <b>2753/4569</b>       |

**Supplementary table 5. Main clinical features of SSc patients included in the study.**

|                                | Sex (cases/controls) |           | Subtype |         | Anti-centromere |          | Anti-topoisomerase |          |
|--------------------------------|----------------------|-----------|---------|---------|-----------------|----------|--------------------|----------|
|                                | Female               | Male      | Difuse  | Limited | Positive        | Negative | Positive           | Negative |
| Overall                        | 0.80/0.79            | 0.11/0.21 | 0.31    | 0.58    | 0.32            | 0.58     | 0.20               | 0.71     |
| US                             | 0.88/0.88            | 0.12/0.12 | 0.34    | 0.61    | 0.29            | 0.62     | 0.16               | 0.77     |
| Spain                          | 0.88/0.75            | 0.10/0.25 | 0.25    | 0.59    | 0.42            | 0.41     | 0.20               | 0.61     |
| German                         | 0.88/0.62            | 0.11/0.38 | 0.35    | 0.44    | 0.42            | 0.53     | 0.31               | 0.62     |
| Dutch                          | 0.72/0.51            | 0.28/0.49 | 0.13    | 0.51    | 0.22            | 0.69     | 0.26               | 0.65     |
| <b>Replication SSc cohorts</b> |                      |           |         |         |                 |          |                    |          |
| Belgium                        | 0.73/0.45            | 0.21/0.54 | 0.31    | 0.63    | 0.23            | 0.47     | 0.18               | 0.52     |
| Spain                          | 0.87/0.60            | 0.11/0.37 | 0.32    | 0.59    | 0.29            | 0.61     | 0.14               | 0.75     |
| The Netherlands                | 0.71/0.45            | 0.20/0.54 | 0.17    | 0.51    | 0.22            | 0.62     | 0.28               | 0.64     |
| Germany                        | 0.81/0.44            | 0.13/0.27 | 0.37    | 0.45    | 0.27            | 0.35     | 0.21               | 0.41     |
| Italy                          | 0.76/0.65            | 0.07/0.35 | 0.20    | 0.60    | 0.31            | 0.53     | 0.32               | 0.52     |
| Norway                         | 0.85/0.33            | 0.15/0.66 | 0.35    | 0.65    | 0.53            | 0.46     | 0.14               | 0.84     |
| Sweden                         | 0.78/0.78            | 0.22/0.22 | 0.28    | 0.72    | 0.27            | 0.73     | 0.17               | 0.83     |
| UK                             | 0.83/0.44            | 0.16/0.56 | 0.27    | 0.72    | 0.28            | 0.54     | 0.11               | 0.70     |
| US                             | 0.88/0.44            | 0.12/0.56 | 0.37    | 0.50    | 0.32            | 0.66     | 0.12               | 0.85     |

**Supplementary figure 1. Quantile-quantile (QQ) plot of the observed P values for association.** The grey dots represent the totality of SNPs analyzed ( $\lambda = 1.069$ ) and the blue dots represent all the SNPs analyzed excluding the MHC region ( $\lambda = 1.066$ ).

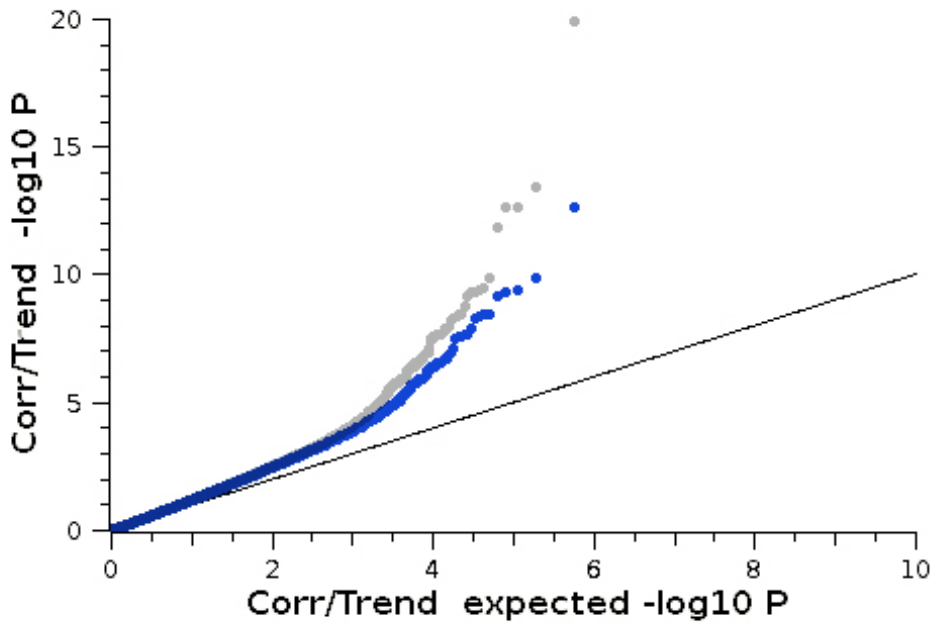

**Supplementary figure 2. Forest plot of the *CDH7* and *EXOC2/IRF4* loci at different study stages.**

**A) *CDH7***

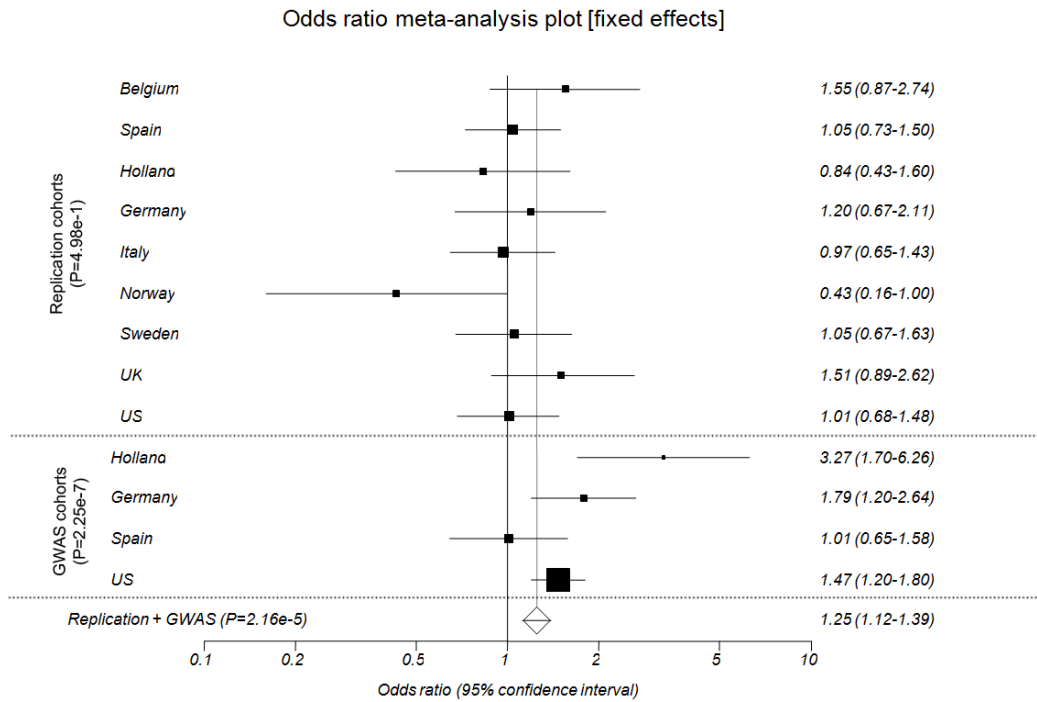

**B) *EXOC2/IRF4***

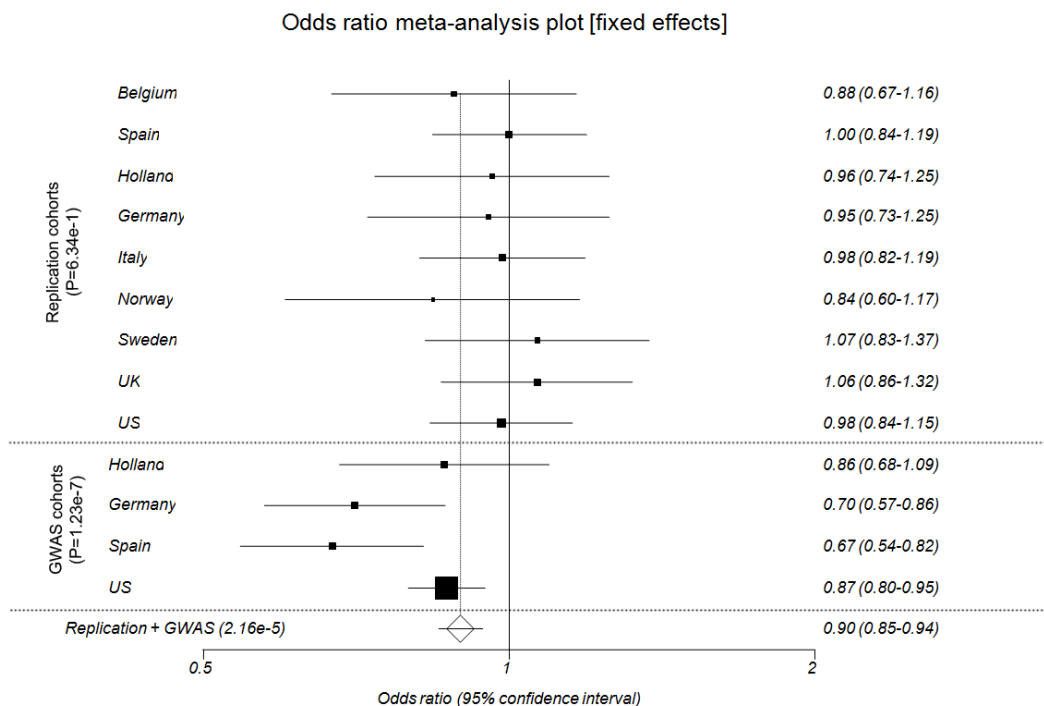



**Supplementary figure 3.** Principal component plot for the first 2 eigenvectors. US population is represented on black, German on blue, Dutch on green and Spanish on orange.

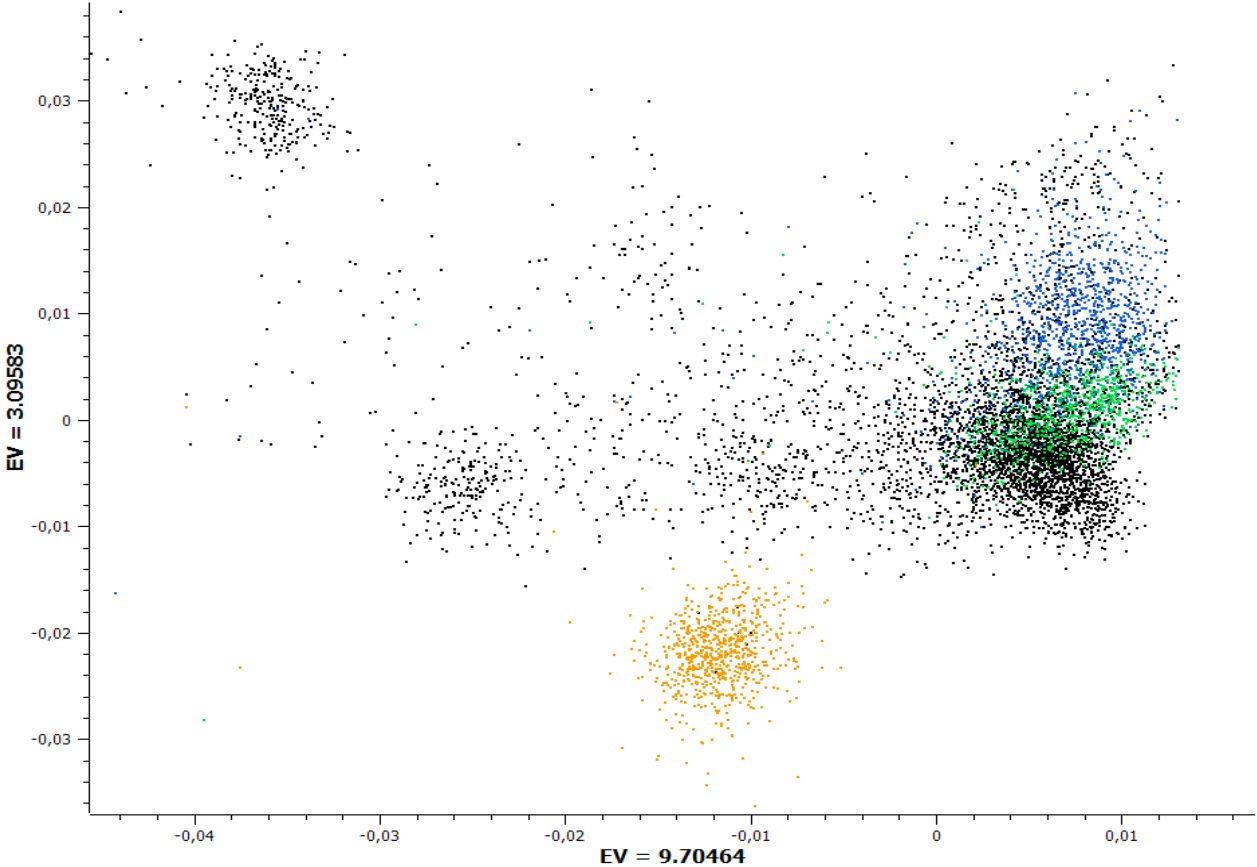

**Supplementary figure 4a.** Association and linkage disequilibrium (LD) plot on TNPO3/IRF5 association region. P values are uncorrected for  $\lambda$ . LD represented is  $R^2$ . Genome wide significance level is marked with a red line.

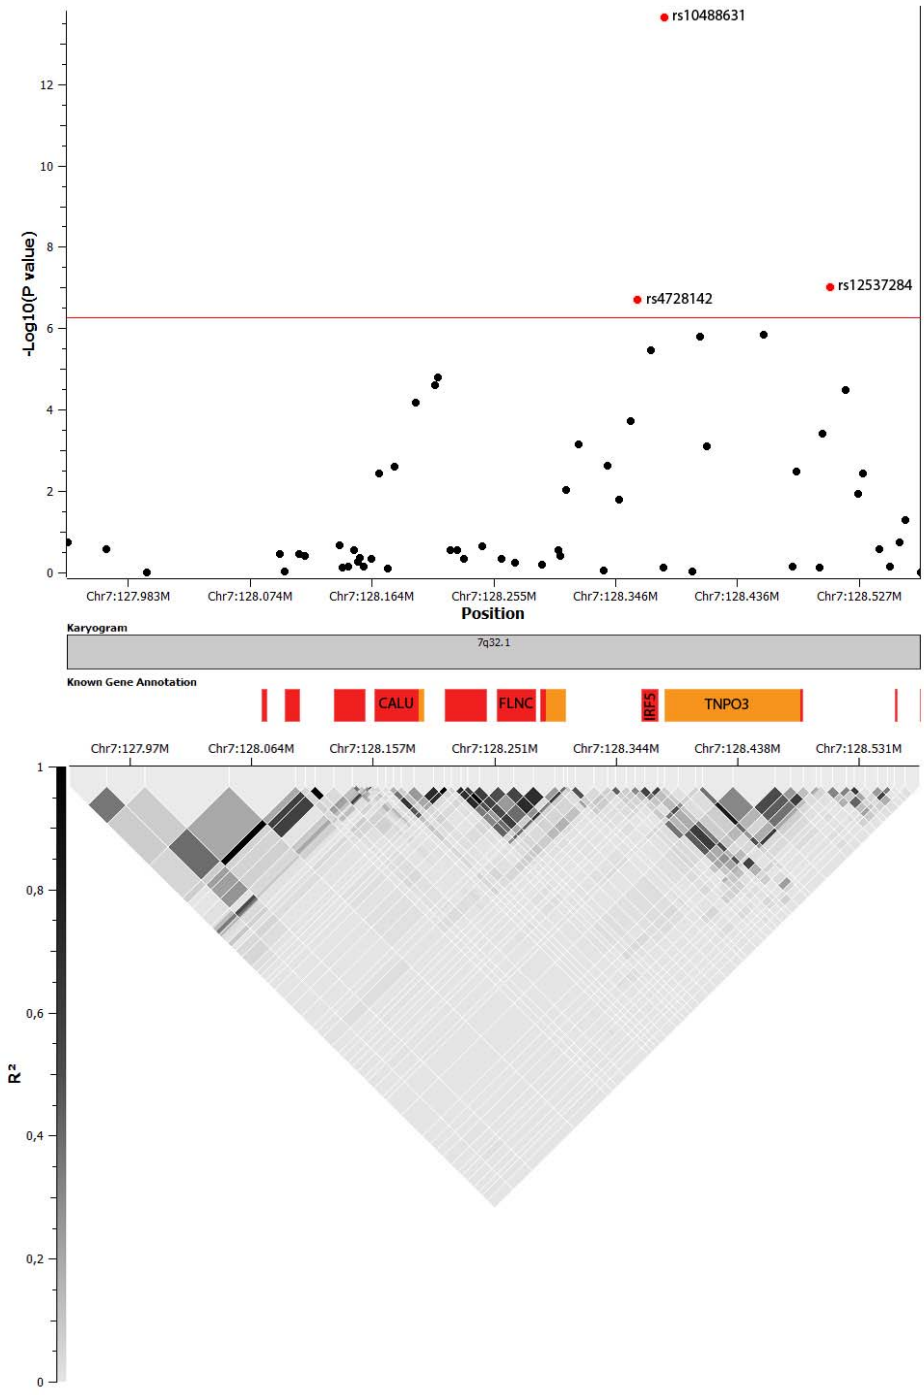

**Supplementary figure 4b.** Association and linkage disequilibrium (LD) plot on STAT4 association region. P values are uncorrected for  $\lambda$ . LD represented is  $R^2$ . Genome wide significance level is marked with a red line.

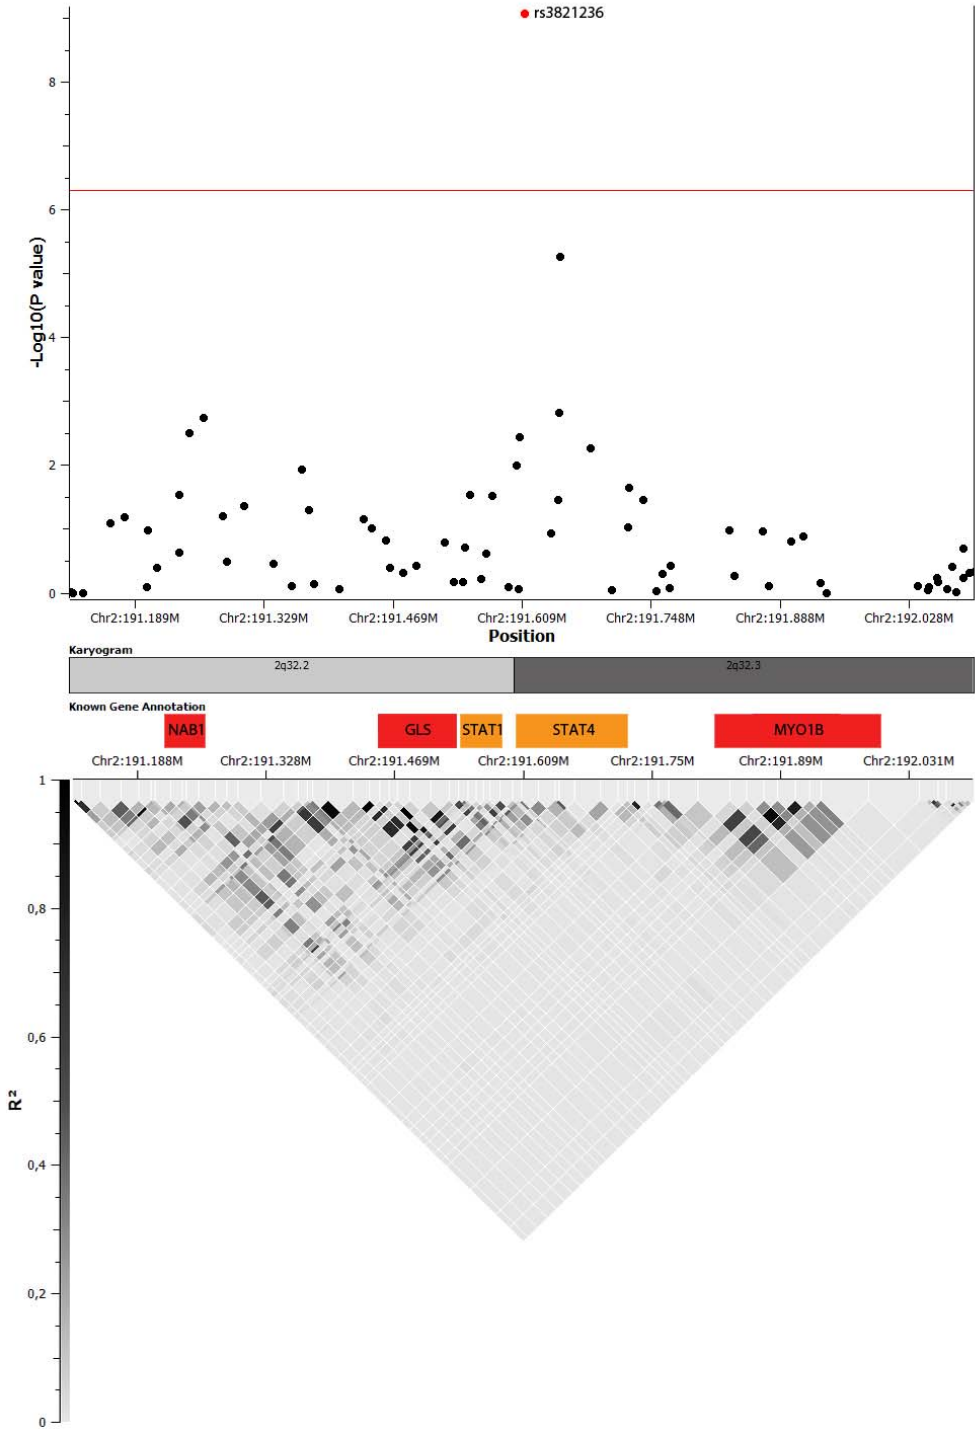

**Supplementary figure 4c.** Association and linkage disequilibrium (LD) plot on CD247 association region. P values are uncorrected for  $\lambda$ . LD represented is  $R^2$ . Genome wide significance level is marked with a red line.

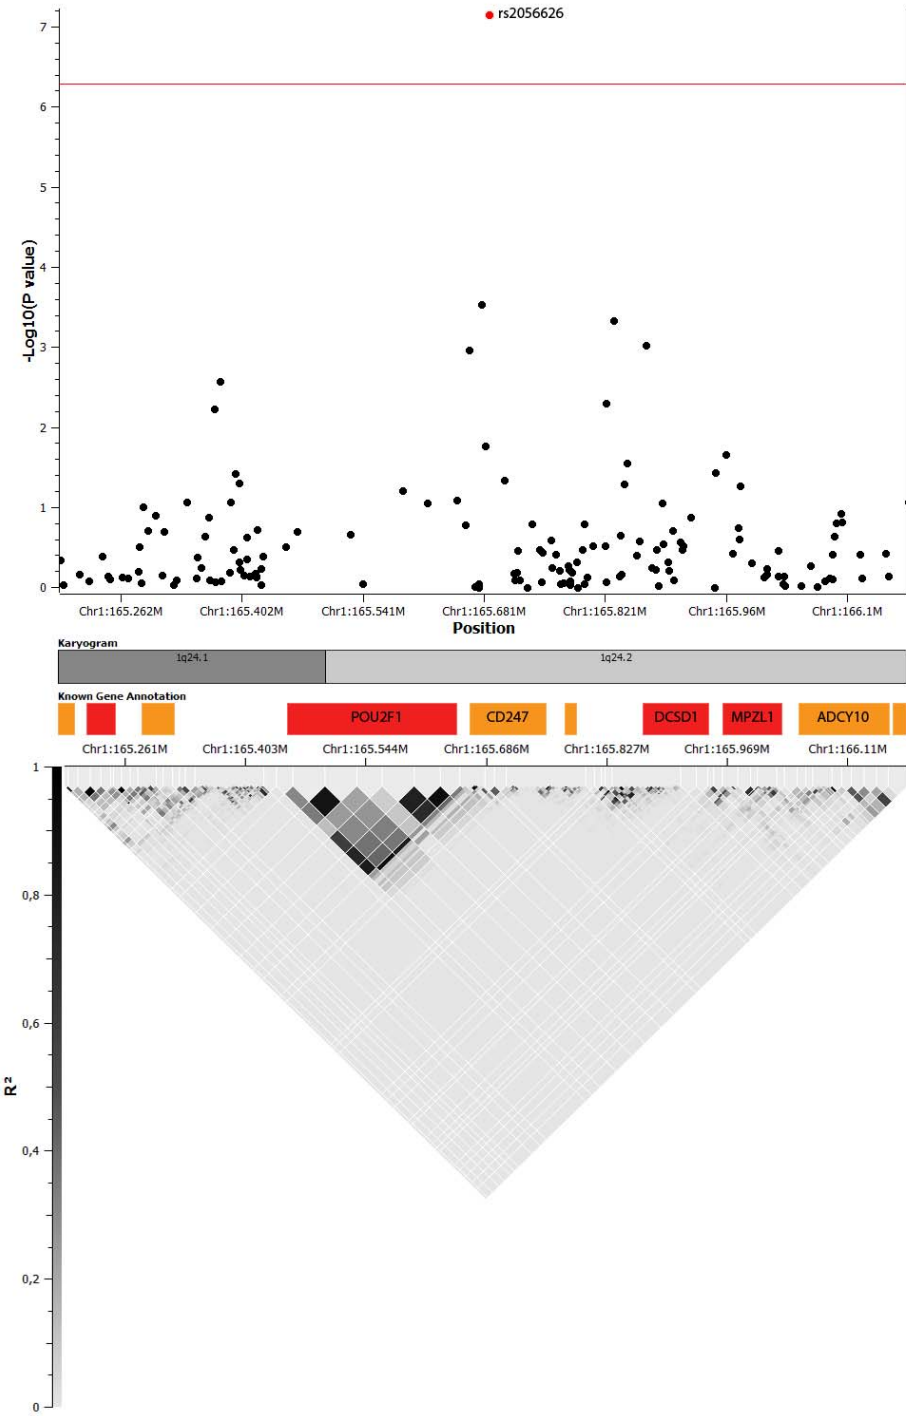

**Supplementary figure 4d.** Association and linkage disequilibrium (LD) plot on CDH7 association region. P values are uncorrected for  $\lambda$ . LD represented is  $R^2$ . Genome wide significance level is marked with a red line.

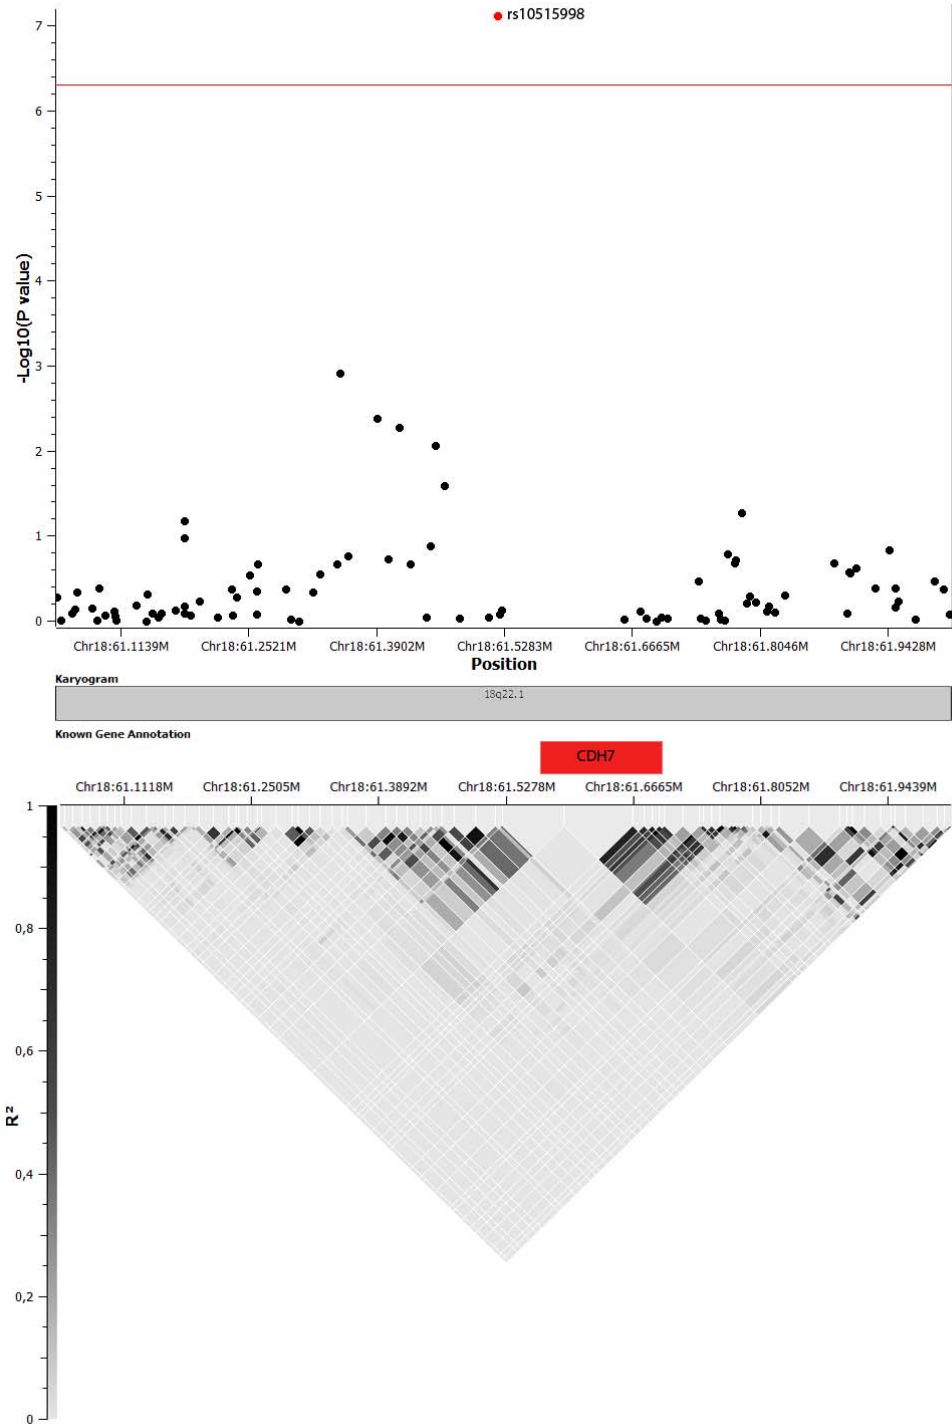

**Supplementary figure 4e.** Association and linkage disequilibrium (LD) plot on EXOC2/IRF4 association region. P values are uncorrected for  $\lambda$ . LD represented is  $R^2$ . Genome wide significance level is marked with a red line.

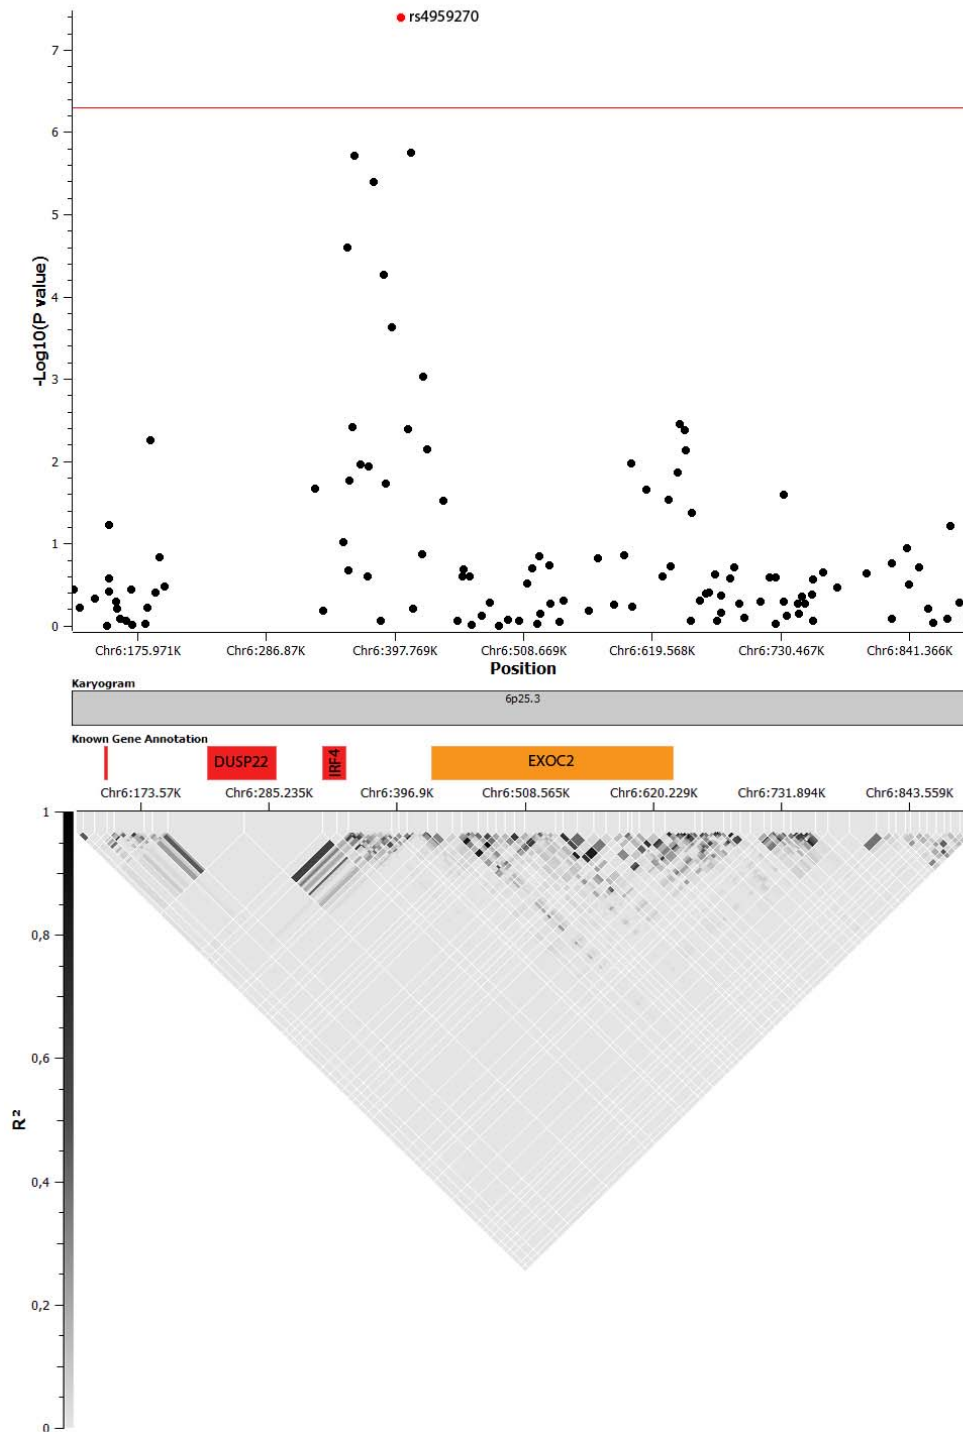

## ***Supplementary note***

### **Spanish SSc Group**

Vicente Fonollosa, Hospital Valle de Hebrón, Barcelona; Mayte Camps and Antonio Fernández-Nebro, Hospital Carlos Haya, Málaga; Rosa García-Portales, Hospital Virgen de la Victoria, Málaga; M<sup>a</sup> Angeles Aguirre-Zamorano, Hospital Reina Sofía, Córdoba; Francisco J García-Hernández and Julio Sánchez-Roman, Hospital Virgen del Rocío, Anna Pros, Hospital del Mar, Barcelona; Luis Rodriguez, Hospital Clínico San Carlos, Madrid; Esther Vicente, Hospital La Princesa, Madrid; Jose Roman-Iborra, Hospital Dr. Peset, Valencia; Bernardino Díaz, Hospital Central de Asturias, Oviedo; Paloma García de la Peña, Hospital Universitario Ramón y Cajal, Madrid.
